# Supplementary material for: Impact of spatial resolution on multi-scenario WRF-ARW simulations driven by the CMIP6 MPI-ESM1-2-HR global model: a focus on precipitation distribution over Italy
Source: Copernicus journal article supplement (doi:10.5194/gmd-18-6095-2025), 2025-09-17
Supplement: Supplementary file 1 [file gmd-18-6095-2025-supplement.pdf]

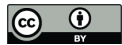

*Supplement of*

**Impact of spatial resolution on multi-scenario WRF-ARW simulations driven by the CMIP6 MPI-ESM1-2-HR global model: a focus on precipitation distribution over Italy**

**Maria Vittoria Struglia et al.**

*Correspondence to:* Maria Vittoria Struglia ([mariavittoria.struglia@enea.it](mailto:mariavittoria.struglia@enea.it))

The copyright of individual parts of the supplement might differ from the article licence.

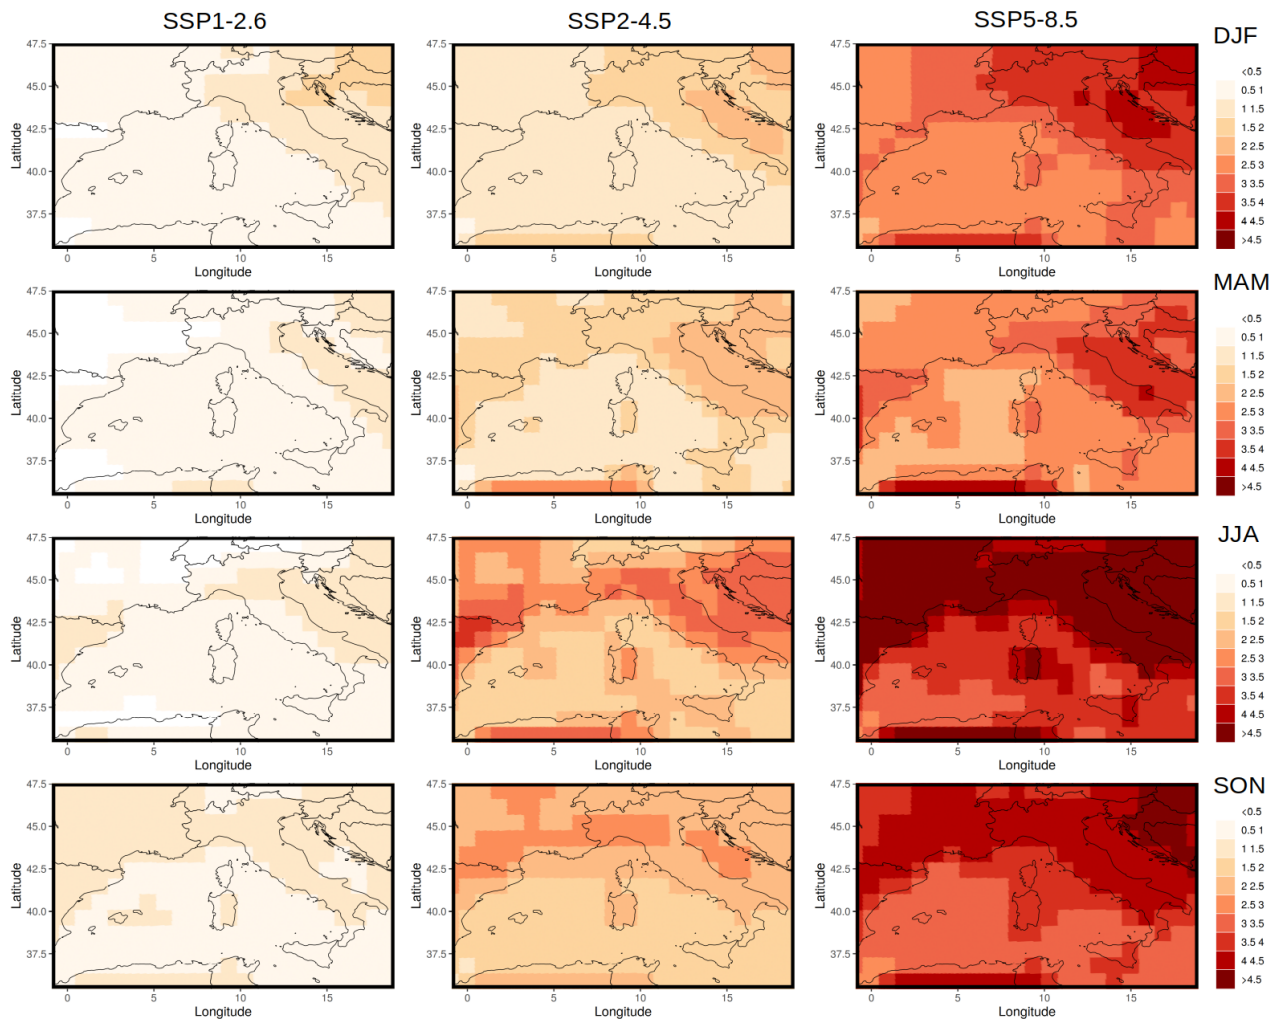

**Figure S1: Projections of temperature change (°C) at the end of the century in the multi-scenario experiments for the global driver MPI-ESM2-1-HR over the same domain of D02 experiment**

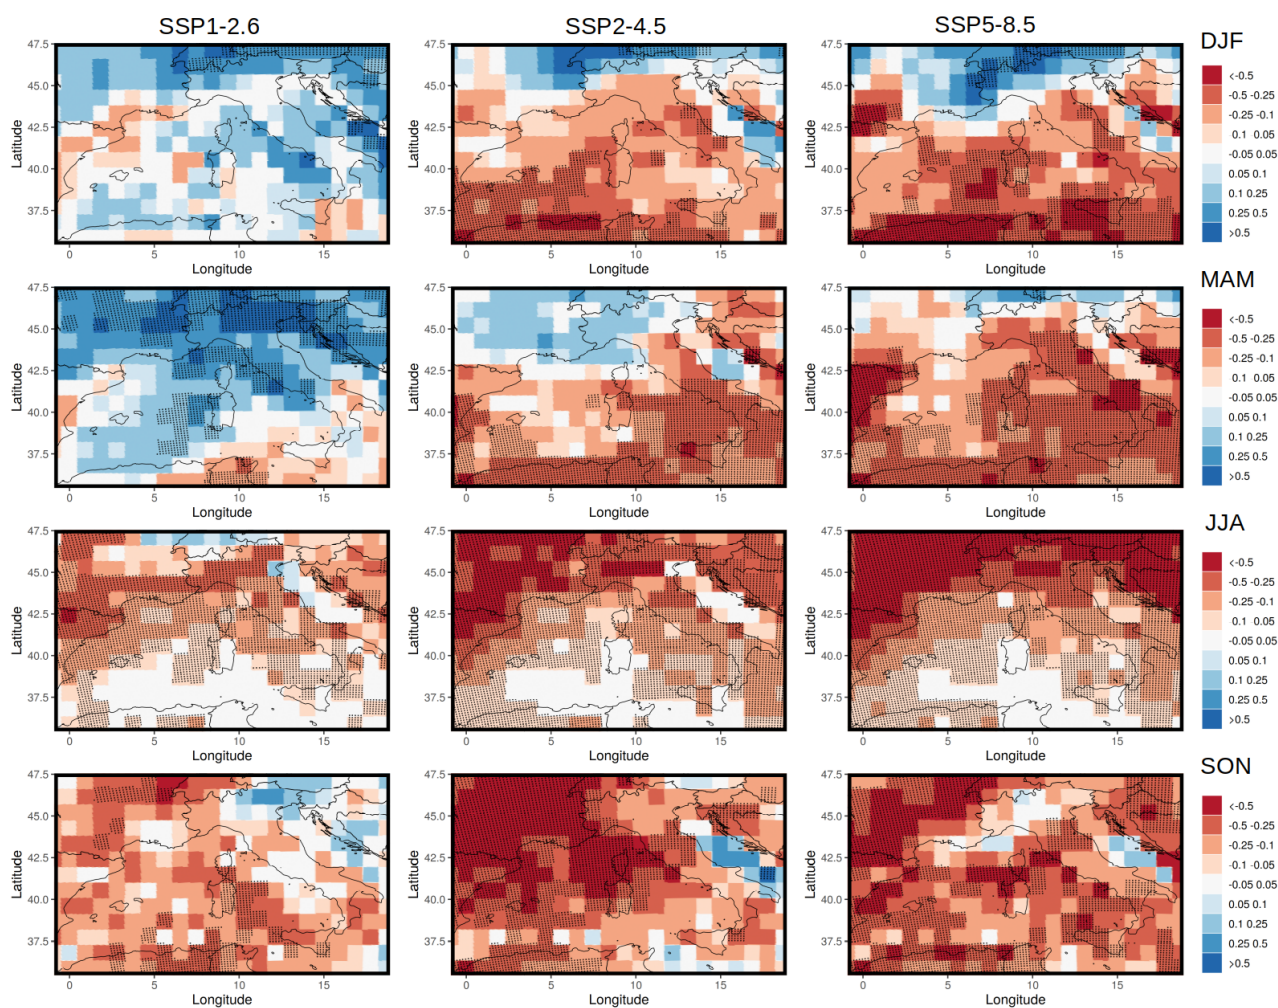

**Figure S2: Projections of precipitation change (mm/day) at the end of the century in the multi-scenario experiments for the global driver MPI-ESM2-1-HR over the same domain of D02 experiment**

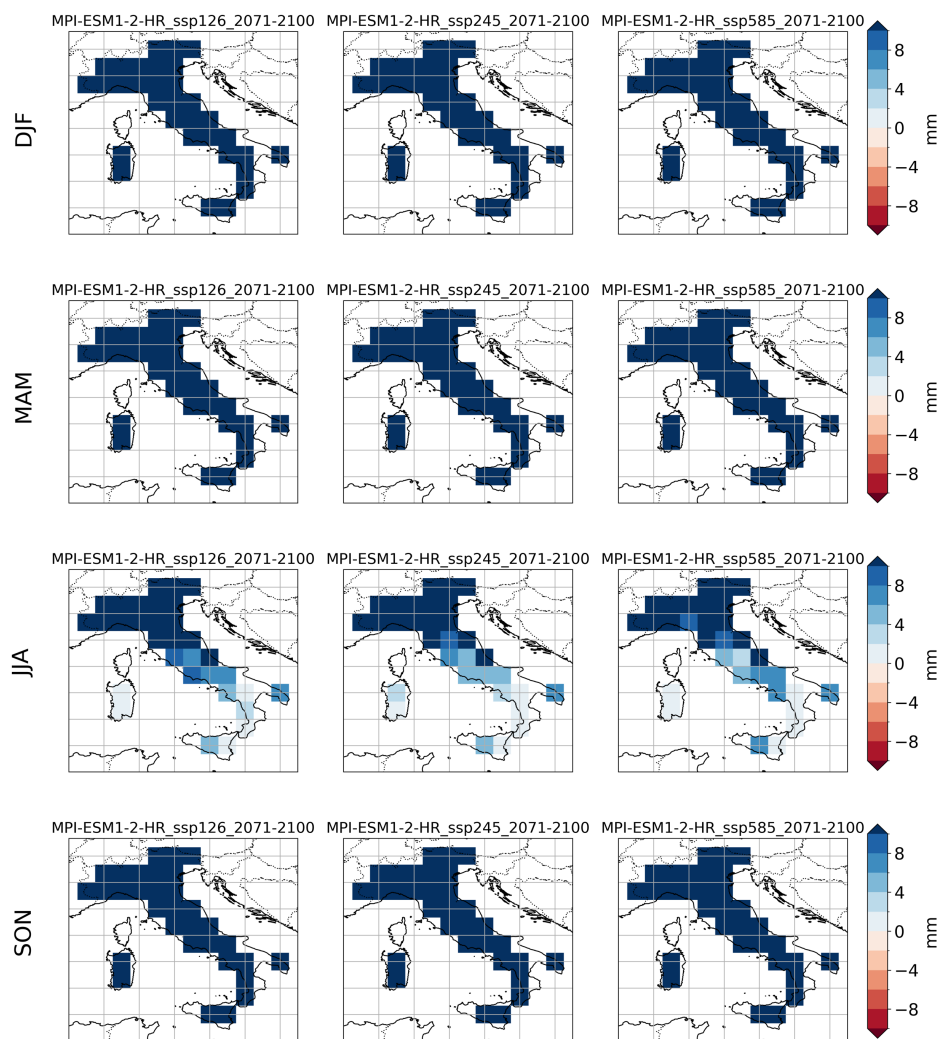

**Figure S3.** Same as Figure 17 of the paper but for the global driver MPI-ESM2-1-HR.
